# Supplementary material for: DNA Fingerprinting of Pearls to Determine Their Origins
Source: PubMed Central journal article supplement (PMC3794040; doi:10.1371/journal.pone.0075606), 2013-10-09

**Figure S1.** Pearls from *P. margaritifera* (PMR), *P. maxima* (PMX) and *P. radiata* (PR) used in method C (Fig. 2).

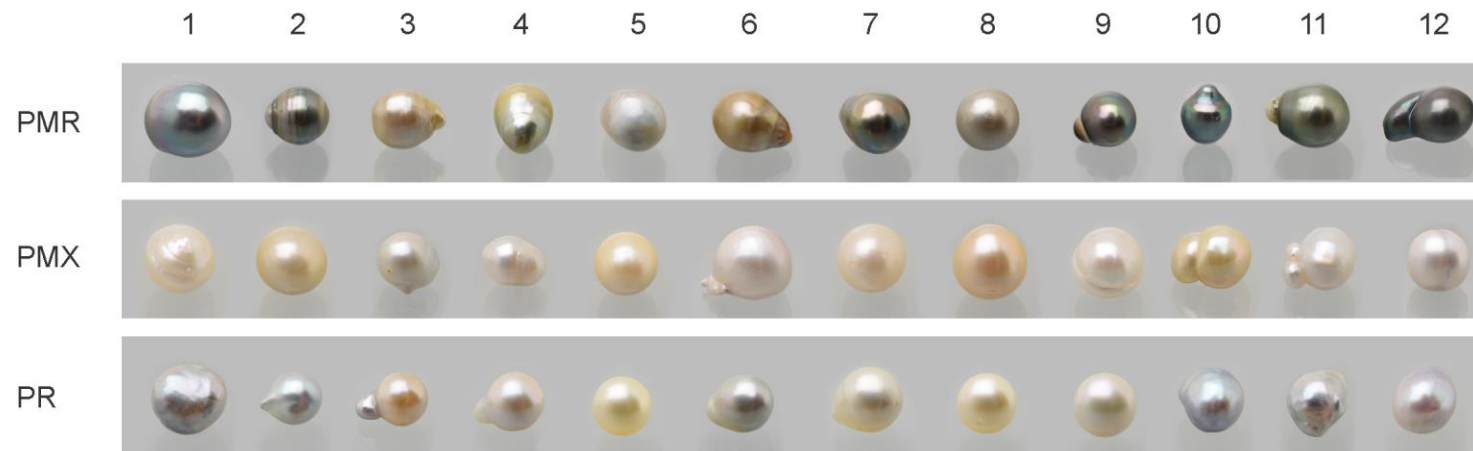

Supplement: pone.0075606.s001.pdf [file pone.0075606.s001.pdf]
