# Supplementary material for: DNA Fingerprinting of Pearls to Determine Their Origins
Source: PubMed Central journal article supplement (PMC3794040; doi:10.1371/journal.pone.0075606), 2013-10-09
Supplement: pone.0075606.s002.pdf [file pone.0075606.s002.pdf]

**Table S1.** Blind test: PCR-RFLP and analysis of the ITS2 sequences from eighteen pearls of unknown identity.

| Pearl sample | Pearl weight (carats / mg) | Sample weight (mg) <sup>a</sup> | ITS2-RFLP <sup>b</sup> results | ITS2 <sup>b</sup> rRNA sequence match                                     | GenBank accession number | Correctly identified? |
|--------------|----------------------------|---------------------------------|--------------------------------|---------------------------------------------------------------------------|--------------------------|-----------------------|
| BL1          | 16.8 / 3358                | 103                             | <i>P. maxima</i>               | <i>P. maxima</i> (AY883851.1) <sup>c</sup><br>461 bp (100 %) <sup>d</sup> | KF284027                 | yes                   |
| BL2          | 10.5 / 2092                | 158                             | <i>P. margaritifera</i>        | <i>P. margaritifera</i> (AY877506.1)<br>292 bp (100 %)                    | KF284028                 | yes                   |
| BL3          | 10.1 / 2012                | 61                              | <i>P. maxima</i>               | <i>P. maxima</i> (AY877504.1)<br>492 bp (99 %)                            | KF284029                 | yes                   |
| BL4          | 9.2 / 1834                 | 115                             | <i>P. margaritifera</i>        | <i>P. margaritifera</i> (AY877506.1)<br>437 bp (100 %)                    | KF284030                 | <b>no</b>             |
| BL5          | 9.1 / 1816                 | 165                             | Not determined                 | Not determined                                                            |                          | <b>no</b>             |
| BL6          | 8.8 / 1754                 | 146                             | <i>P. radiata</i>              | <i>P. fucata</i> <sup>e</sup> (AB214478.1)<br>207 bp (100 %)              | KF284031                 | yes                   |
| BL7          | 8.3 / 1658                 | 417                             | <i>P. radiata</i>              | <i>P. fucata</i> (AY877582.1)<br>538 bp (99 %)                            | KF284032                 | yes                   |
| BL8          | 7.8 / 1550                 | 672                             | <i>P. margaritifera</i>        | <i>P. margaritifera</i> <sup>f</sup>                                      |                          | yes                   |
| BL9          | 7.3 / 1456                 | 178                             | <i>P. radiata</i>              | <i>P. fucata</i> (AY877582.1)<br>511 bp (99 %)                            | KF284033                 | yes                   |
| BL10         | 6.8 / 1354                 | 38                              | <i>P. margaritifera</i>        | <i>P. margaritifera</i> <sup>f</sup>                                      |                          | yes                   |
| BL11         | 6.6 / 1324                 | 547                             | <i>P. margaritifera</i>        | <i>P. margaritifera</i> (AY877506.1)<br>437 bp (100 %)                    | KF284034                 | yes                   |
| BL12         | 6.0 / 1198                 | 154                             | <i>P. margaritifera</i>        | <i>P. margaritifera</i> (AY877506.1)<br>435 bp (100 %)                    | KF284035                 | yes                   |
| BL13         | 5.8 / 1154                 | 615                             | <i>P. margaritifera</i>        | <i>P. margaritifera</i> (AY877506.1)<br>437 bp (100 %)                    | KF284036                 | yes                   |
| BL14         | 4.3 / 868                  | 142                             | <i>P. maxima</i>               | <i>P. maxima</i> (AY877505.1)<br>494 bp (100 %)                           | KF284037                 | yes                   |

|      |           |     |                   |                                                 |          |     |
|------|-----------|-----|-------------------|-------------------------------------------------|----------|-----|
| BL15 | 4.3 / 856 | 84  | <i>P. maxima</i>  | <i>P. maxima</i> (AY877505.1)<br>494 bp (100 %) | KF284038 | yes |
| BL16 | 4.1 / 818 | 184 | <i>P. radiata</i> | <i>P. fucata</i> (AY877582.1)<br>489 bp (99 %)  | KF284039 | yes |
| BL17 | 3.3 / 652 | 170 | <i>P. radiata</i> | <i>P. fucata</i> (AY877582.1)<br>538 bp (99 %)  | KF284040 | yes |
| BL18 | 2.5 / 504 | 88  | <i>P. radiata</i> | <i>P. fucata</i> (AY877582.1)<br>489 bp (99 %)  | KF284041 | yes |

---

<sup>a</sup> the sample used for DNA extraction consisted of material extracted from the interior of the pearl, including ground nacre and OM.

<sup>b</sup> ITS2: nuclear internal transcribed spacer 2 located between the 5.8S and 28S ribosomal RNA genes. RFLP: restriction fragment length polymorphism.

<sup>c</sup> *Pinctada* species assignment was based on the highest BLAST score (highest query coverage and maximal base pair identity). GenBank accession number shown in brackets.

<sup>d</sup> amplicon size (base pair) and maximal identity (%) of the sequence to the BLAST query.

<sup>e</sup> *P. fucata* is conspecific to *P. radiata* according to their ITS sequences [50].

<sup>f</sup> sample had low sequence quality, but the BLAST query in GenBank recovered the correct *Pinctada* species.
