# Supplementary material for: DNA Fingerprinting of Pearls to Determine Their Origins
Source: PubMed Central journal article supplement (PMC3794040; doi:10.1371/journal.pone.0075606), 2013-10-09
Supplement: pone.0075606.s003.pdf [file pone.0075606.s003.pdf]

**Table S2.** PCR primers, amplicon lengths and references.

| Gene product                              | Organellar localization | Primer sequence (5'-3')      | Primer name      | Tann (°C) | Fragment length (bp)    | Reference  |
|-------------------------------------------|-------------------------|------------------------------|------------------|-----------|-------------------------|------------|
| 16S rRNA <sup>a</sup>                     | Mitochondrial           | CGCCTGGTTGATTA AAAACATTGCTGC | 16S pinctada for | 55        | PMR: 511                | [49], [50] |
|                                           |                         | CCGGTTTGA ACTCAGATCACGTA     | 16S pinctada rev |           | PMX: 509<br>PR: 524     |            |
| <i>cox1</i> <sup>a</sup>                  | Mitochondrial           | TCGTATAGAGCTCCGTCGACCTG      | LCX              | 45        | PMR: 576                | [45]       |
|                                           |                         | TGGAACAAA ACTGGATCGCC        | HCY              |           | PMX: 576<br>PR: 576     |            |
| ITS1 <sup>a</sup>                         | Nuclear                 | CACACCGCCCGTCGCTACTA         | sp-1-5           | 52        | PMR: 675                | [44], [51] |
|                                           |                         | ATTTAGCTGCGGTCTTCATC         | sp-1-3           |           | PMX: 701<br>PR: 627     |            |
| ITS2 <sup>a</sup>                         | Nuclear                 | GCAGGACACATTGAACATCG         | 5.8S-F           | 52        | PMR: 575                | [51]       |
|                                           |                         | CCAAGGACGTTCTTAGCAGAAG       | 28S-R            |           | PMX: 571<br>PR: 590-591 |            |
| <i>P. margaritifera</i> ITS2 <sup>a</sup> | Nuclear                 | CTGTTCTGTCATGACGACGG         | ITS2-Marg-F      | 52        | PMR: 335                | This study |
| <i>P. maxima</i> ITS2 <sup>a</sup>        | Nuclear                 | GGGCCTATTTCCGTGTTGAG         | ITS2-Max-F       | 52        | PMX: 332                | This study |
| <i>P. radiata</i> ITS2 <sup>a</sup>       | Nuclear                 | CTGTCGATGGATGACTTACACG       | ITS2-Rad-F       | 52        | PR: 336-337             | This study |

<sup>a</sup> 16S rRNA: mitochondrial 16S ribosomal RNA gene; *cox1*: mitochondrial cytochrome oxidase subunit I gene; ITS1: nuclear internal transcribed spacer 1 located between the 18S and 5.8S ribosomal RNA gene; ITS2: nuclear internal transcribed spacer 2 located between the 5.8S and 28S ribosomal RNA genes.
